# Supplementary material
Source: MDPI journal article supplement (https://www.mdpi.com/2227-9040/9/5/96)
Supplement: s1 [file s1]

## Article

# A Paper-Based Potentiometric Platform for Determination of Water Hardness

Mohammed L. Bouhoun <sup>1,2</sup>, Pascal Blondeau <sup>1</sup>, Yamina Louafi <sup>2</sup> and Francisco J. Andrade <sup>1,\*</sup>

<sup>1</sup> Department of Analytical and Organic Chemistry, Universitat Rovira i Virgili, 43007 Tarragona, Spain; bouhoun-m-l@hotmail.fr (M.L.B.); pascal.blondeau@urv.cat (P.B.)

<sup>2</sup> Laboratory of Electrochemistry-Corrosion, Metallurgy and Inorganic Chemistry, Faculty of Chemistry, U.S.T.H.B., BP 32, Algiers 16111, Algeria; amina.elouafi@yahoo.fr

\* Correspondence: franciscojavier.andrade@urv.cat

**Citation:** Bouhoun, M.L.; Blondeau, P.; Louafi, Y.; Andrade, F.J. A Paper-Based Potentiometric Platform for Determination of Water Hardness. *Chemosensors* **2021**, *9*, 96. <https://doi.org/10.3390/chemosensors9050096>

Academic Editors: Sam F. Y. Li and Alain Walcarius

Received: 10 March 2021

Accepted: 25 April 2021

Published: 28 April 2021

**Publisher's Note:** MDPI stays neutral with regard to jurisdictional claims in published maps and institutional affiliations.

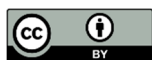

**Copyright:** © 2021 by the authors. Submitted for possible open access publication under the terms and conditions of the Creative Commons Attribution (CC BY) license (<http://creativecommons.org/licenses/by/4.0/>).

**Table S1.** Classification of water quality according to the total hardness.

| Water type      | Water hardness (mg L <sup>-1</sup> CaCO <sub>3</sub> ) |
|-----------------|--------------------------------------------------------|
| Soft            | 0–50                                                   |
| Moderately soft | 50–100                                                 |
| Slightly hard   | 100–150                                                |
| Moderately hard | 150–250                                                |
| Hard            | 250–350                                                |
| Very hard       | 350<                                                   |

**Table S2.** Mg<sup>2+</sup>, Ca<sup>2+</sup> Ion selective and reference membranes composition respectively.

| Mg <sup>2+</sup> Membrane |                                           | wt %  |
|---------------------------|-------------------------------------------|-------|
| Ion exchanger             | Potassium tetrakis(4-chlorophenyl)-borate | 0.76  |
| Ionophore                 | Magnesium ionophore VI                    | 1.03  |
| Matrix                    | PVC (81387)                               | 30.93 |
| Plasticizer               | o-NPOE                                    | 67.28 |
| Solvent                   | THF                                       | 1 mL  |

| Ca <sup>2+</sup> Membrane |                                           | wt %  |
|---------------------------|-------------------------------------------|-------|
| Ion exchanger             | Potassium tetrakis(4-chlorophenyl)-borate | 0.60  |
| Ionophore                 | Calcium ionophore II (ETH 129)            | 1.00  |
| Matrix                    | PVC (81387)                               | 32.80 |
| Plasticizer               | o-NPOE                                    | 65.60 |
| Solvent                   | THF                                       | 1 mL  |

| Reference Membrane      | Quantity |
|-------------------------|----------|
| Polyvinyl butyral (PVB) | 78 mg    |
| Sodium chloride (NaCl)  | 50 mg    |
| Methanol                | 1 mL     |

**Table S3.** Analytical parameters of calcium and magnesium paper-based ISEs in a separate calibration.

|                 | Ca <sup>2+</sup> separately        | Mg <sup>2+</sup> separately        |
|-----------------|------------------------------------|------------------------------------|
| Sensitivity     | 27.0 ± 0.07                        | 30.9 ± 0.03                        |
| Linear range    | 10 <sup>-6</sup> –10 <sup>-1</sup> | 10 <sup>-6</sup> –10 <sup>-1</sup> |
| Detection limit | 3.3 × 10 <sup>-7</sup>             | 3.6 × 10 <sup>-7</sup>             |

**Table S4.** The chemical composition of the artificial water samples with chloride as counter anion.

| Samples | Concentration (mol/l) |                  |                 |                |
|---------|-----------------------|------------------|-----------------|----------------|
|         | Ca <sup>2+</sup>      | Mg <sup>2+</sup> | Na <sup>+</sup> | K <sup>+</sup> |
| 1       | 5.24E-04              | 2.06E-04         | 3.91E-04        | 3.58E-05       |
| 2       | 1.80E-04              | 6.17E-05         | 1.74E-04        | 5.12E-05       |
| 3       | 7.76E-04              | 2.30E-04         | 2.35E-04        | 4.35E-05       |
| 4       | 4.59E-04              | 2.30E-04         | 2.39E-04        | 9.72E-05       |
| 5       | 3.12E-04              | 1.56E-04         | 4.78E-04        | 1.00E-04       |
| 6       | 9.73E-05              | 1.11E-04         | 1.26E-04        | 3.58E-05       |
| 7       | 3.74E-04              | 1.69E-04         | 2.74E-04        | 5.88E-05       |
| 8       | 1.87E-03              | 2.06E-03         | 4.00E-04        | 1.00E-04       |
| 9       | 4.99E-03              | 6.17E-03         | 4.00E-04        | 1.00E-04       |
| 10      | 1.00E-03              | 1.00E-03         | 4.00E-04        | 1.00E-04       |
| 11      | 1.00E-04              | 7.40E-03         | 4.00E-04        | 1.00E-04       |

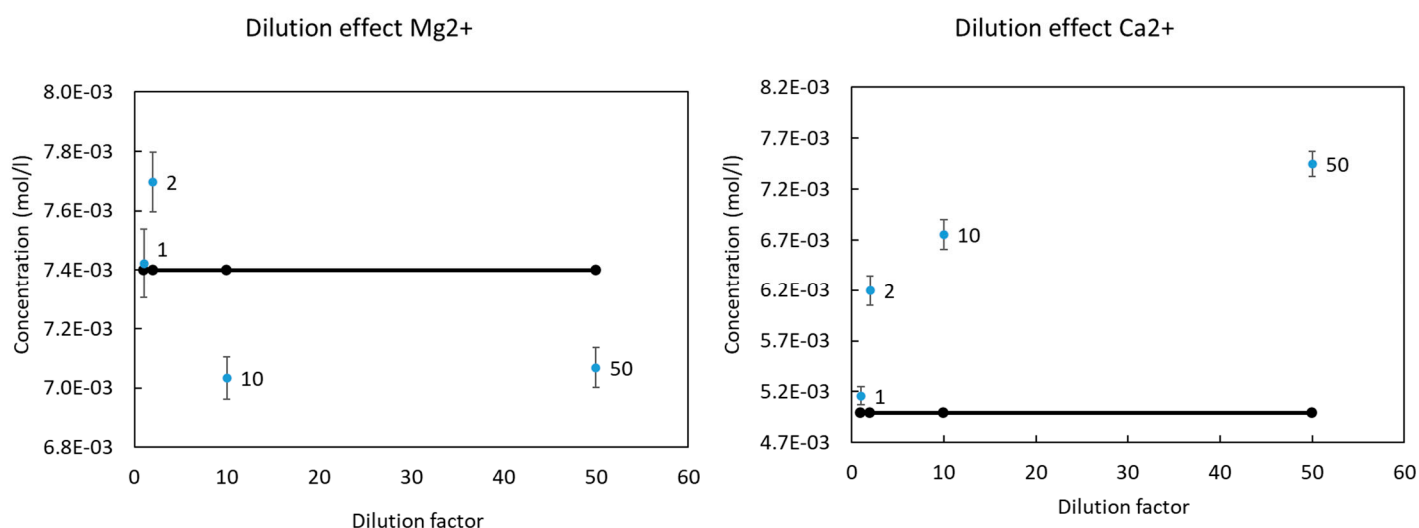**Figure S1.** The dilution effect on the prediction of Mg<sup>2+</sup> and Ca<sup>2+</sup> sensors respectively (N = 3).**Table S5.** Prediction of Ca<sup>2+</sup> and Mg<sup>2+</sup> in artificial water samples.

a) Separated measurements (N = 3)

| Sample N° | Log a (Mg 2+) |      |          |         |
|-----------|---------------|------|----------|---------|
|           | Average       | SD   | Expected | Recover |
| 1         | -3.75         | 0.03 | -3.69    | -0.02   |
| 2         | -4.34         | 0.05 | -4.21    | -0.03   |
| 3         | -3.78         | 0.04 | -3.64    | -0.04   |
| 4         | -3.77         | 0.11 | -3.64    | -0.04   |
| 5         | -3.92         | 0.11 | -3.81    | -0.03   |
| 6         | -4.05         | 0.10 | -3.95    | -0.02   |
| 7         | -3.85         | 0.09 | -3.77    | -0.02   |
| 8         | -2.71         | 0.05 | -2.69    | -0.01   |
| 10        | -2.99         | 0.05 | -3.00    | 0.00    |

| Log a (Ca 2+)                                             |         |       |          |         |
|-----------------------------------------------------------|---------|-------|----------|---------|
| Sample N°                                                 | Average | SD    | Expected | Recover |
| 1                                                         | −3.34   | 0.04  | −3.28    | −0.02   |
| 2                                                         | −3.87   | 0.05  | −3.75    | −0.03   |
| 3                                                         | −3.26   | 0.04  | −3.11    | −0.05   |
| 4                                                         | −3.49   | 0.04  | −3.34    | −0.04   |
| 5                                                         | −3.54   | 0.02  | −3.51    | −0.01   |
| 6                                                         | −4.04   | 0.03  | −4.01    | −0.01   |
| 7                                                         | −3.48   | 0.03  | −3.43    | −0.01   |
| 8                                                         | −2.83   | 0.01  | −2.73    | −0.04   |
| 10                                                        | −3.11   | 0.01  | −3.00    | −0.04   |
| Total hardness as of CaCO <sub>3</sub> mg L <sup>−1</sup> |         |       |          |         |
| Sample N°                                                 | Average | SD    | Expected | Recover |
| 1                                                         | 63.40   | 2.96  | 72.97    | 0.13    |
| 2                                                         | 18.31   | 1.02  | 24.14    | 0.24    |
| 3                                                         | 72.36   | 3.91  | 100.64   | 0.28    |
| 4                                                         | 50.18   | 1.60  | 68.95    | 0.27    |
| 5                                                         | 41.51   | 3.55  | 46.82    | 0.11    |
| 6                                                         | 18.23   | 2.09  | 20.84    | 0.13    |
| 7                                                         | 47.79   | 3.40  | 54.30    | 0.12    |
| 8                                                         | 344.68  | 17.70 | 392.85   | 0.12    |
| 10                                                        | 180.87  | 10.87 | 200.00   | 0.10    |

Total hardness is given as CaCO<sub>3</sub> (mg L<sup>−1</sup>) by the equation:

$$^{\circ}\text{TH} = ([\text{Ca}^{2+}] + [\text{Mg}^{2+}]) / (10^{-5})$$

where  $[\text{Ca}^{2+}] + [\text{Mg}^{2+}]$  represents the sum of the molar concentrations of these ions.

**b)** Simultaneous measurements (N = 3).

| Log a (Mg 2+) |         |      |          |         |
|---------------|---------|------|----------|---------|
| Sample N°     | Average | SD   | Expected | Recover |
| 1             | −3.71   | 0.05 | −3.69    | −0.01   |
| 4             | −3.59   | 0.03 | −3.64    | 0.01    |
| 5             | −3.75   | 0.03 | −3.81    | 0.01    |
| 6             | −3.95   | 0.04 | −3.95    | 0.00    |
| 7             | −3.77   | 0.04 | −3.77    | 0.00    |
| 10            | −3.01   | 0.01 | −3.00    | 0.00    |

| Log a (Ca2+) |         |      |          |         |
|--------------|---------|------|----------|---------|
| Sample N°    | Average | SD   | Expected | Recover |
| 1            | −3.30   | 0.12 | −3.28    | −0.01   |
| 4            | −3.16   | 0.11 | −3.34    | 0.05    |
| 5            | −3.35   | 0.11 | −3.51    | 0.05    |
| 6            | −3.83   | 0.11 | −4.01    | 0.05    |
| 7            | −3.35   | 0.11 | −3.43    | 0.02    |

|    |       |      |       |      |
|----|-------|------|-------|------|
| 10 | −2.94 | 0.01 | −3.00 | 0.02 |
|----|-------|------|-------|------|

| Total hardness as of CaCO <sub>3</sub> mg L <sup>−1</sup> |         |       |          |         |
|-----------------------------------------------------------|---------|-------|----------|---------|
| Sample N°                                                 | Average | SD    | Expected | Recover |
| 1                                                         | 69.55   | 11.18 | 72.97    | 0.05    |
| 4                                                         | 95.25   | 15.54 | 68.95    | −0.38   |
| 5                                                         | 62.76   | 9.84  | 46.82    | −0.34   |
| 6                                                         | 26.11   | 2.91  | 20.84    | −0.25   |
| 7                                                         | 62.18   | 9.23  | 54.30    | −0.15   |
| 10                                                        | 214.10  | 0.21  | 200.00   | −0.07   |

## Reference

- [1] Abeliotis, K.; Candan, C.; Amberg, C.; Ferri, A.; Osset, M.; Owens, J.; Stamminger, R. Impact of water hardness on consumers' perception of laundry washing result in five European countries, *Int. J. Consum. Stud.* **2015**, *39*, 60–66, doi: 10.1111/ijcs.12149.
